# Supplementary material for: Solution behavior of iron(iii) and iron(ii) porphyrins in DMSO and reaction with superoxide. Effect of neighboring positive charge on thermodynamics, kinetics and nature of iron-(su)peroxo product
Source: Royal Society of Chemistry journal article supplement (doi:10.1039/c1dt11521a), 2011-11-01
Supplement: c1dt11521a.pdf [file c1dt11521a.pdf]

## Supplementary Information

# Solution Behavior of Iron(III) and Iron(II) Porphyrins in DMSO and Reaction with Superoxide. Effect of Neighboring Positive Charge on Thermodynamics, Kinetics and Nature of Iron-(Su)peroxo Product

*Katharina Duerr,<sup>a</sup> Oliver Troeppner,<sup>a</sup> Julianna Olah,<sup>b,c</sup> Jing Li,<sup>a</sup> Achim Zahl,<sup>a</sup> Thomas*

*Drewello,<sup>a</sup> Norbert Jux,<sup>a</sup> Jeremy N. Harvey,<sup>b</sup> and Ivana Ivanović-Burmazović<sup>a</sup> \**

*<sup>a</sup>Department of Chemistry and Pharmacy, University of Erlangen-Nürnberg, Egerlandstr. 1,  
91058 Erlangen, Germany*

*<sup>b</sup>School of Chemistry and Centre for Computational Chemistry, University of Bristol,  
Cantock's Close, Bristol BS8 1TS, UK.*

*<sup>c</sup>Present address: Department of Inorganic and Analytical Chemistry and Materials Structure  
and Modeling Research Group of the Hungarian Academy of Sciences, Budapest University  
of Technology and Economics, P.O. Box 91, 1521 Budapest, Hungary*

\*Author to whom correspondence should be addressed. E-mail: ivana.ivanovic@chemie.uni-erlangen.de

## Bulk electrolysis of $[\text{Fe}^{\text{III}}(\text{tBuTPP})(\text{DMSO})_2]^+$ and characterization of $[\text{Fe}^{\text{III}}(\text{tBuTPP})\text{OH}]$ and $([\text{Fe}^{\text{III}}(\text{tBuTPP})])_2\text{O}$ .

In order to obtain the Fe(II) form of the complex, bulk electrolysis of  $[\text{Fe}^{\text{III}}(\text{tBuTPP})(\text{DMSO})_2]^+$  was performed according to our previous study.<sup>5</sup> Due to the moisture sensitivity of  $[\text{Fe}^{\text{III}}(\text{tBuTPP})(\text{DMSO})_2]^+$  the composition of reactant and product solutions was dependent on a water/hydroxide content in DMSO, as defined by two equilibria in Scheme S1 (Figure S1). The composition of solutions affects the electrochemical processes.

### Scheme S1

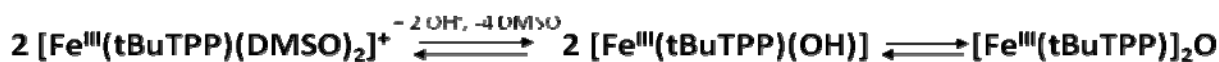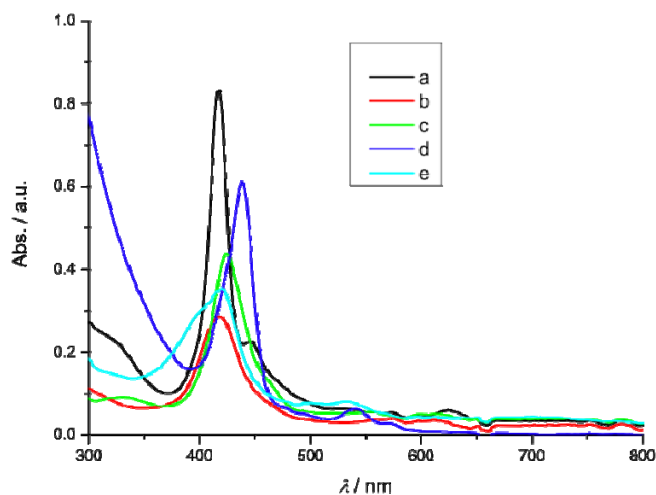

**Figure S1.** UV/Vis spectra of  $[\text{Fe}^{\text{III}}(\text{tBuTPP})(\text{DMSO})_2]^+$  ( $c = 2 \times 10^{-5}$  M in DMSO with 0.1 M  $\text{Bu}_4\text{NPF}_6$ ) and species according to Scheme S1 upon addition of base or acid: a) mixture of  $[\text{Fe}^{\text{III}}(\text{tBuTPP})]_2\text{O}$  and  $[\text{Fe}^{\text{III}}(\text{tBuTPP})\text{OH}]$ ; b)  $[\text{Fe}^{\text{III}}(\text{tBuTPP})]_2\text{O}$  (saturated solution); c) mixture of  $[\text{Fe}^{\text{III}}(\text{tBuTPP})\text{OH}]$  and  $[\text{Fe}^{\text{III}}(\text{tBuTPP})(\text{DMSO})_2]$ ; d)  $[\text{Fe}^{\text{III}}(\text{tBuTPP})\text{OH}]$ ; e)  $[\text{Fe}^{\text{III}}(\text{tBuTPP})(\text{DMSO})_2]^+$ .

In the commercially available “dry” DMSO the Fe(III) complex is present as a mixture of bis-DMSO and hydroxo species (Figure S1c). Upon addition of proton sources (water or diluted acid) the pure bis-DMSO complex is obtained (Figure S1e). Upon addition of base at first the hydroxo complex is observed (Figure S1d), whereas gradually, upon addition of a large excess of base (in the form of solid tetrabutylammonium hydroxide, TBAOH) the equilibrium (Scheme S1) shifts to dimer formation. In DMSO it is not possible to push the equilibrium completely to the dimer (Figure S1a). The dimer can be isolated as a precipitate from basic  $\text{CH}_2\text{Cl}_2$  solution (see Experimental section) and by dissolving it in DMSO a pure solution of it can be obtained (Figure S1b). Due to its low solubility, even its saturated solution shows relatively weak absorption bands. Characteristic UV/Vis absorptions are summarized in Table S1. The characterization of these species helped us to identify the side reactions and products along the reaction path with superoxide (*vide infra*).

**Table S1: UV/Vis parameters of the species in Figure S1.**

| Species                                                    | Soret band / nm<br>( $\epsilon / \text{L mol}^{-1} \text{cm}^{-1}$ ) | Q bands / nm<br>( $\epsilon / \text{L mol}^{-1} \text{cm}^{-1}$ ) |
|------------------------------------------------------------|----------------------------------------------------------------------|-------------------------------------------------------------------|
| $[\text{Fe}^{\text{III}}(\text{tBuTPP})(\text{DMSO})_2]^+$ | 404 sh (15400), 419 (17600)                                          | 496 sh (3850), 535 (4000),<br>719 (2095)                          |
| $[\text{Fe}^{\text{III}}(\text{tBuTPP})\text{OH}]$         | 416 sh (14900), 438 (30600)                                          | 540 (3100), 573 (1400)                                            |
| $[\text{Fe}^{\text{III}}(\text{tBuTPP})]_2\text{O}$        | 417                                                                  | 560 (sh), 574, 613                                                |

If in the starting solution a mixture of  $[\text{Fe}^{\text{III}}(\text{tBuTPP})(\text{DMSO})_2]^+$  and  $[\text{Fe}^{\text{III}}(\text{tBuTPP})\text{OH}]$  is present, reduction to the  $\text{Fe}^{\text{II}}$  form ( $n = 1, 2$ ) (Figure S2) is incomplete at a potential of -0.2 V, yielding a mixture of  $[\text{Fe}^{\text{II}}(\text{tBuTPP})(\text{DMSO})_n]$  ( $n = 1, 2$ ) and  $[\text{Fe}^{\text{III}}(\text{tBuTPP})\text{OH}]$ . Because of the hydroxo compound's high stability and its more negative redox potential, complete reduction to the iron(II) complex was not possible. Use of a more negative potential leads first to quantitative production of the hydroxo compound and then to decomposition of solvent and the porphyrin complex (Figure S2). Quantitative production of  $[\text{Fe}^{\text{II}}(\text{tBuTPP})(\text{DMSO})_n]$  ( $n = 1, 2$ ) could only be achieved by applying at first a very positive potential of 1.6 V, which transforms the mixture of hydroxo and bis-DMSO complexes to pure  $[\text{Fe}^{\text{III}}(\text{tBuTPP})(\text{DMSO})_2]^+$ . This process can be monitored by UV/Vis spectroscopy (Figure S3). After that, quantitative reduction to  $[\text{Fe}^{\text{II}}(\text{tBuTPP})(\text{DMSO})_n]$  ( $n = 1, 2$ ) was successful at  $E = -0.6$  V (Figure S4).

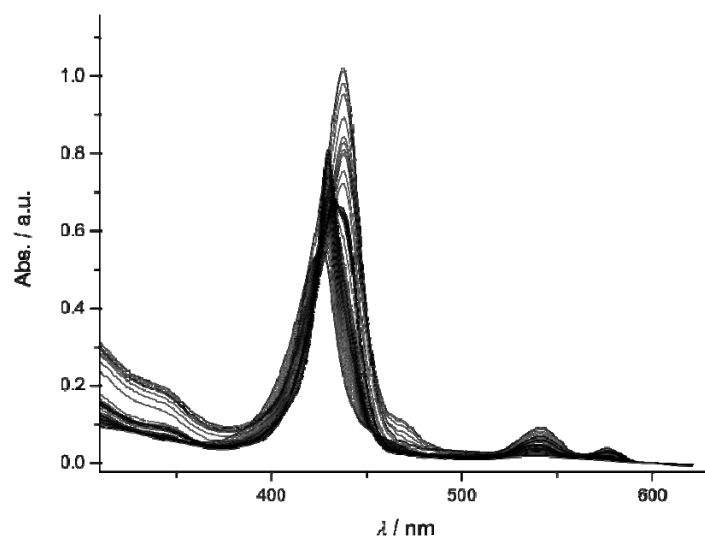

**Figure S2:** UV/vis spectra for electrochemical reduction (60 min) of  $[\text{Fe}^{\text{III}}(\text{tBuTPP})(\text{DMSO})_2]^+$  ( $c = 2 \times 10^{-5}$  M;  $I = 0.1$  M) in DMSO with 0.1 M  $\text{Bu}_4\text{NPF}_6$  in presence of moisture. A mixture of  $[\text{Fe}^{\text{II}}(\text{tBuTPP})(\text{DMSO})_n]$  ( $n = 1, 2$ ) and  $[\text{Fe}^{\text{III}}(\text{tBuTPP})\text{OH}]$  was firstly obtained at  $E = -0.2$  V and pure  $[\text{Fe}^{\text{III}}(\text{tBuTPP})\text{OH}]$  was obtained at more negative potential.

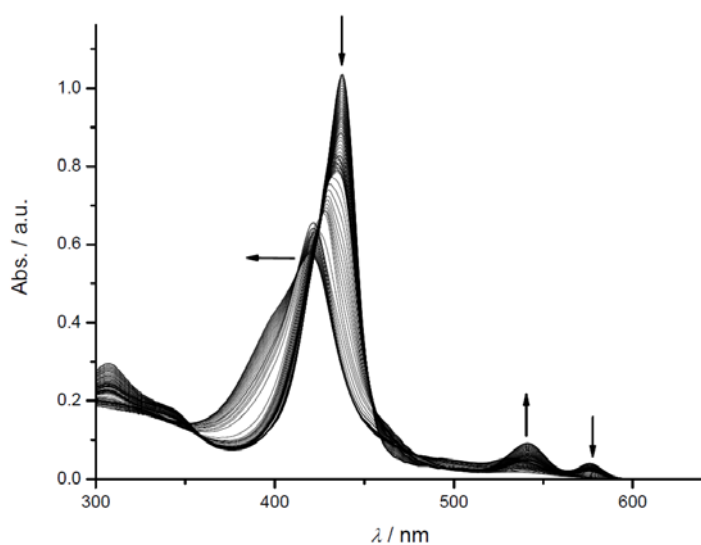

**Figure S3:** UV/vis spectra obtained by applying potential of 1.6 V (6 min) on the mixture of  $[\text{Fe}^{\text{III}}(\text{tBuTPP})\text{OH}]$  and  $[\text{Fe}^{\text{III}}(\text{tBuTPP})(\text{DMSO})_2]^+$  (total concentration =  $2 \times 10^{-5}$  M;  $I = 0.1$  M) in DMSO with 0.1 M  $\text{Bu}_4\text{NPF}_6$ , resulting in pure  $[\text{Fe}^{\text{III}}(\text{tBuTPP})(\text{DMSO})_2]^+$ .

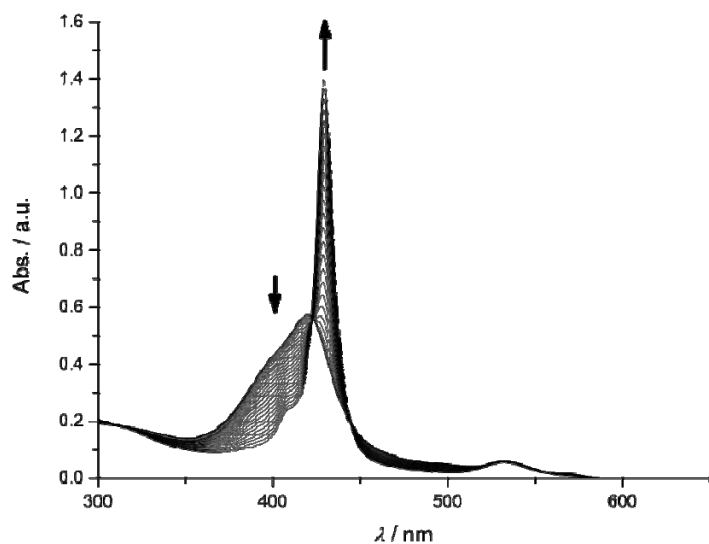

**Figure S4.** UV/Vis spectra accompanying electrochemical reduction (10 min) of  $[\text{Fe}^{\text{III}}(\text{tBuTPP})(\text{DMSO})_2]^+$  ( $c = 2 \times 10^{-5} \text{ M}$ ;  $I = 0.1 \text{ M}$ ) in DMSO with  $0.1 \text{ M Bu}_4\text{NPF}_6$  to  $[\text{Fe}^{\text{II}}(\text{tBuTPP})(\text{DMSO})_n]$  ( $n = 1, 2$ ) at  $E = -0.6 \text{ V}$ .

### Effect of Temperature and Pressure on the Equilibrium Constant $K_{\text{DMSO}}$ .

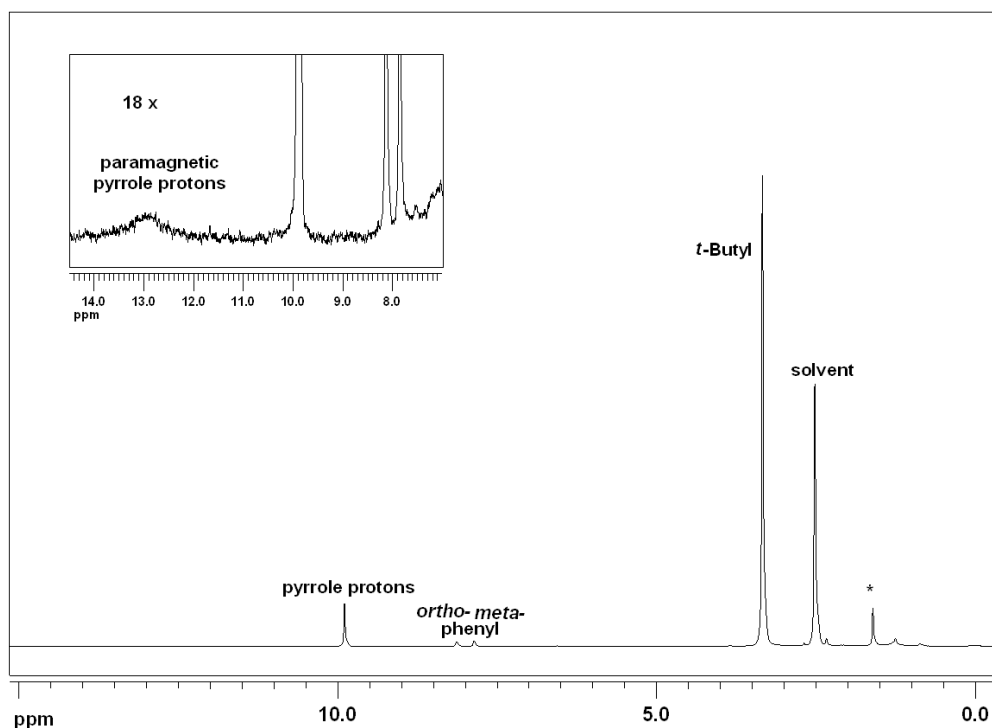

**Figure S5:**  $^1\text{H}$  NMR spectrum of  $[\text{Fe}^{\text{II}}(\text{tBuTPP})(\text{DMSO})_n]$  ( $n = 1, 2$ ) (room temperature and atmospheric pressure); assignment of proton shifts for  $[\text{Fe}^{\text{II}}(\text{tBuTPP})(\text{DMSO})_2]$ , \* corresponds to *t*-Butyl group of  $[\text{Fe}^{\text{II}}(\text{tBuTPP})(\text{DMSO})]$ ; conditions: spectrum taken after chemical reduction of  $[\text{Fe}^{\text{III}}(\text{tBuTPP})\text{Cl}]$  (2mM) in  $\text{DMSO-d}_6$  by excess of  $\text{Na}_2\text{S}_2\text{O}_4$ .

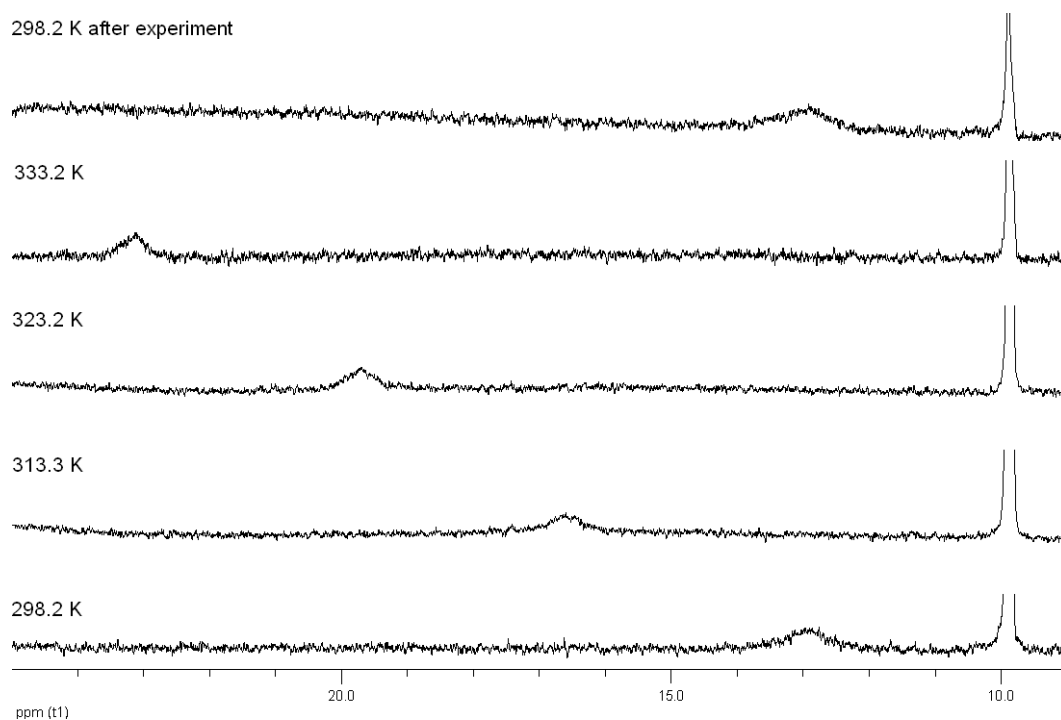

**Figure S6:**  $^1\text{H}$  NMR spectrum of  $[\text{Fe}^{\text{II}}(\text{tBuTPP})(\text{DMSO})_n]$  ( $n = 1, 2$ ) taken at different temperatures; conditions: spectrum taken after chemical reduction of  $[\text{Fe}^{\text{III}}(\text{tBuTPP})\text{Cl}]$  (2mM) in  $\text{DMSO-d}_6$  by excess of  $\text{Na}_2\text{S}_2\text{O}_4$ .

In analogy to  $\text{Fe}(\text{III})$  porphyrins with spin admixed states<sup>4</sup> and analogous complex with covalently attached crown ether,<sup>5</sup> the percentage of the low-spin species is calculated according to eq. (1) ( $\delta$  is the chemical shift of the pyrrole protons of the equilibrium mixture; the limiting value for the low-spin species is ca. 9 ppm<sup>2</sup> and for the high-spin species ca. 60 ppm).<sup>3</sup>

$$\text{Int}(\%) = \left[ \frac{(60 - \delta)}{51} \right] \times 100\% \quad (1)$$

The species distribution at different temperatures and pressures is summarized in Table S2. The values show that mostly the low-spin bis-DMSO complex exists in solution. From the results in Table S2 the equilibrium constant  $K_{\text{DMSO}}$  can be calculated according to eq. (2) (in which the activity of solvent is considered to be 1) and the data are summarized in Table S2. On the basis of the temperature and pressure dependent data for  $K_{\text{DMSO}}$  the

corresponding thermodynamic parameters can be estimated according to equations (3) and (4), respectively.

$$K_1 = [\text{HS}]/[\text{LS}] \quad (2)$$

[HS]: high-spin *mono*-DMSO complex concentration

[LS]: low-spin *bis*-DMSO complex concentration

[DMSO] = 14.08 M.

$$\ln(K) = \frac{-\Delta H^\circ}{RT} + \frac{\Delta S^\circ}{R} \quad (3)$$

$$\left( \frac{\partial \ln(K)}{\partial P} \right)_T = \frac{-\Delta V^\circ}{RT} \quad (4)$$

**Table S2:** Low-spin/high-spin species distribution for  $[\text{Fe}^{\text{II}}(\text{tBuTPP})(\text{DMSO})_n]$  ( $n = 1, 2$ ) and the values of the equilibrium constant  $K_{\text{DMSO}}$  at different temperatures and pressures calculated according to eq. (1).

| <b><i>T</i> / K</b>                    | <b><math>\delta</math> / ppm</b> | <b>% low-spin</b> | <b>% high-spin</b> | <b><math>K_{\text{DMSO}}</math></b> |
|----------------------------------------|----------------------------------|-------------------|--------------------|-------------------------------------|
| 298.2                                  | 12.88                            | 92.4              | 7.6                | $0.082 \pm 0.002$                   |
| 313.2                                  | 16.51                            | 85.3              | 14.7               | $0.172 \pm 0.002$                   |
| 323.2                                  | 19.63                            | 79.2              | 20.8               | $0.262 \pm 0.003$                   |
| 333.2                                  | 23.11                            | 72.3              | 27.7               | $0.383 \pm 0.003$                   |
| <b><i>p</i> / MPa<br/>(at 325.2 K)</b> | <b><math>\delta</math> / ppm</b> | <b>% low-spin</b> | <b>% high-spin</b> | <b><math>K_{\text{DMSO}}</math></b> |
| 2                                      | 20.05                            | 78.3              | 21.7               | $0.277 \pm 0.003$                   |
| 30                                     | 18.80                            | 80.8              | 19.2               | $0.238 \pm 0.003$                   |
| 90                                     | 16.50                            | 85.3              | 14.7               | $0.172 \pm 0.002$                   |
| 150                                    | 14.40                            | 89.4              | 10.6               | $0.118 \pm 0.002$                   |

The reaction enthalpy  $\Delta H^\circ$  was obtained from the slope and the reaction entropy  $\Delta S^\circ$  from the intercept of the plot of  $\ln(K_{\text{DMSO}})$  versus  $1/T$  (see Figure S7). The reaction volume  $\Delta V^\circ$  results from the slope of the plot of  $\ln(K_{\text{DMSO}})$  versus pressure (see Figure 1 in manuscript).

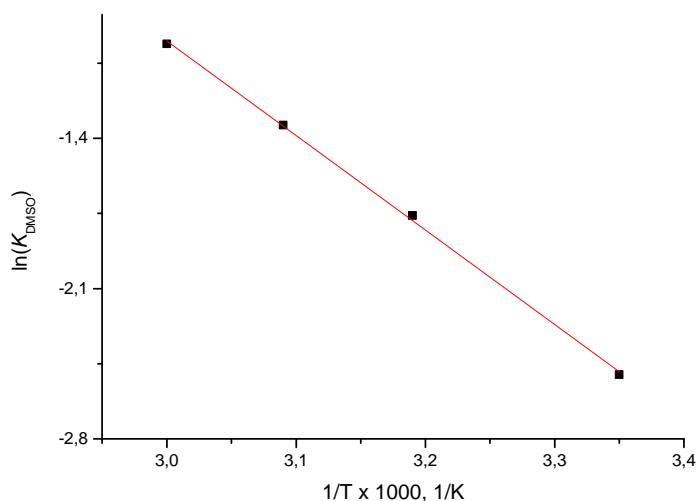

**Figure S7:** Plot of temperature dependent  $\ln(K_{\text{DMSO}})$  against  $1/T$  for  $[\text{Fe}^{\text{II}}(\text{tBuTPP})(\text{DMSO})_n]$  ( $n = 1, 2$ ) system.

### ESI and cryospray mass spectrometry.

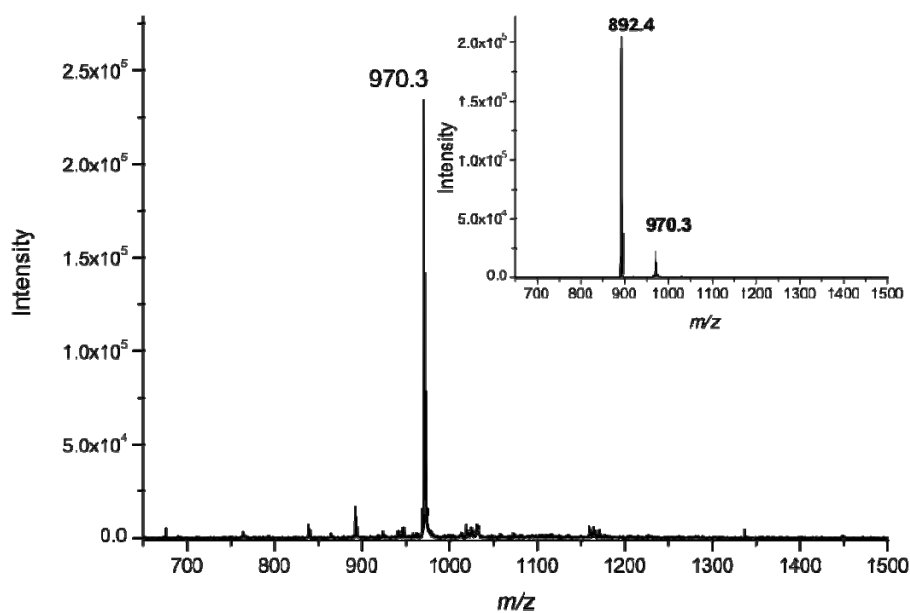

**Figure S8:** ESI mass spectrometry of  $[\text{Fe}^{\text{III}}(\text{tBuTPP})(\text{DMSO})_2]^+$ ; peak at  $m/z = 970.3$  is  $[\text{Fe}^{\text{III}}(\text{tBuTPP})(\text{DMSO})]^+$ ; Inset shows MS/MS experiment,  $m/z = 892.4$  is  $[\text{Fe}^{\text{III}}(\text{tBuTPP})]^+$ .



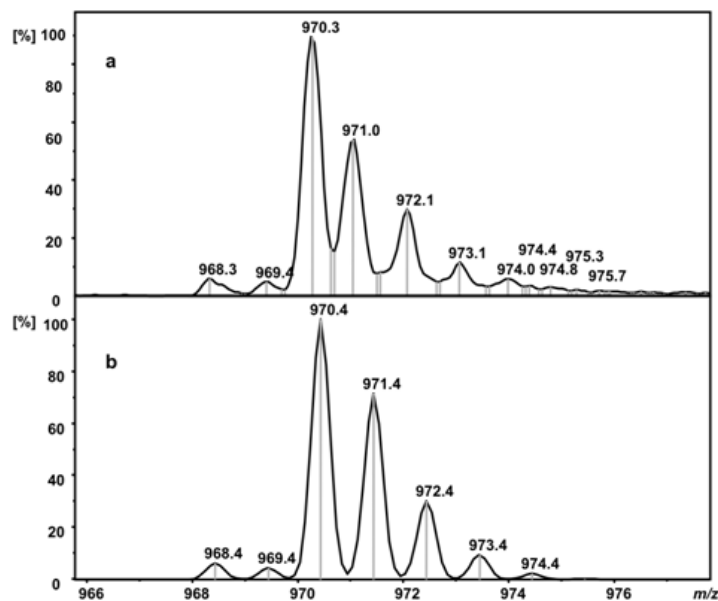

**Figure S9:** Comparison of measured and calculated isotopic distribution; a) spectrum of  $[\text{Fe}^{\text{III}}(\text{tBuTPP})(\text{DMSO})]^+$ , b) calculation of  $[\text{Fe}^{\text{III}}(\text{tBuTPP})(\text{DMSO})]^+$  ( $\text{C}_{62}\text{H}_{66}\text{FeN}_4\text{OS}$ ).

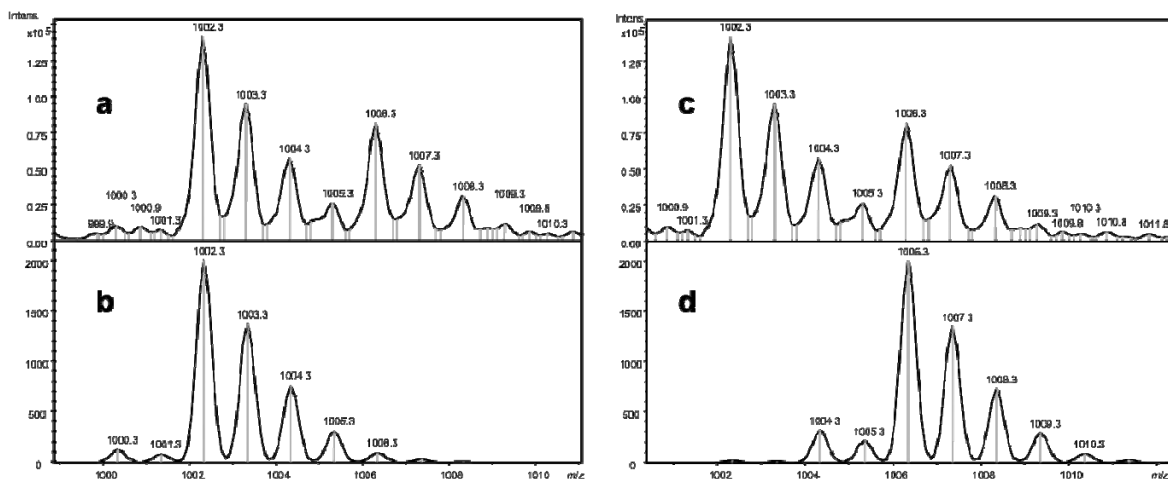

**Figure S10:** Comparison of measured and calculated isotopic distribution; a) spectrum of  $\{\text{K}^+ + \text{K}[\text{Fe}^{\text{III}}(\text{tBuTPP})(\text{O}_2^{2-})]\}$ , b) calculation of  $\{\text{K}^+ + \text{K}[\text{Fe}^{\text{III}}(\text{tBuTPP})(\text{O}_2^{2-})]\}$  ( $\text{C}_{60}\text{H}_{60}\text{FeN}_4\text{K}_2\text{O}_2$ ), c) spectrum of  $\{\text{K}^+ + \text{K}[\text{Fe}^{\text{III}}(\text{tBuTPP})(^{18}\text{O}_2^{2-})]\}$  (some residual a) in spectrum), d) calculation of  $\{\text{K}^+ + \text{K}[\text{Fe}^{\text{III}}(\text{tBuTPP})(^{18}\text{O}_2^{2-})]\}$  ( $\text{C}_{60}\text{H}_{60}\text{FeN}_4\text{K}_2^{18}\text{O}_2$ ).

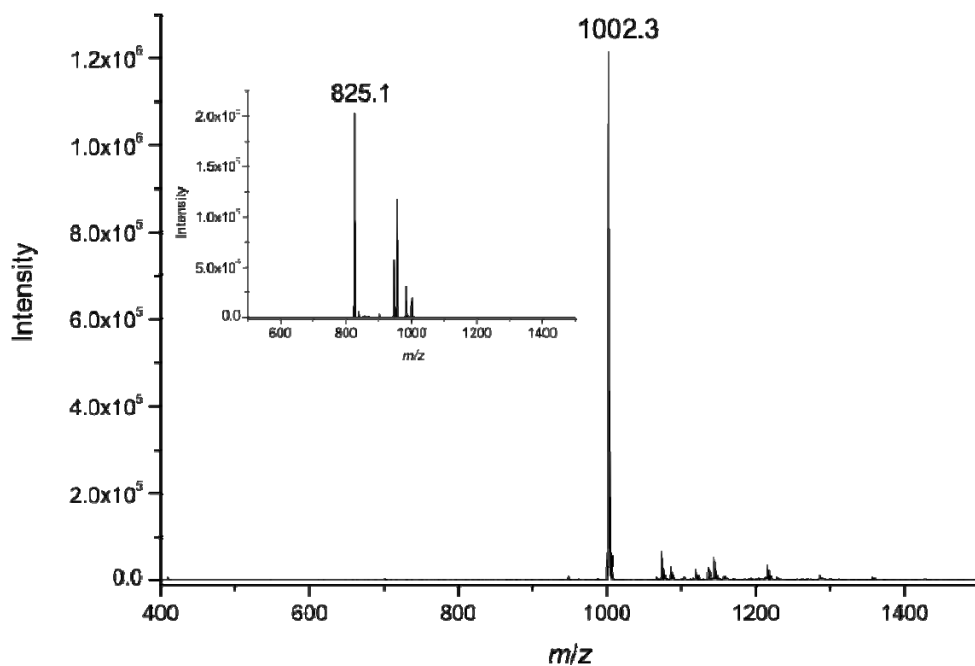

**Figure S11:** Mass spectrum of  $\{K^+ + K[Fe^{III}(tBuTPP)(O_2^{2-})]\}$ . Inset: MS/MS of  $m/z = 1002.3$  (porphyrin fragments at  $m/z = 825.1, 958.1, 946.2$  and  $984.1$  which could not further be clarified).

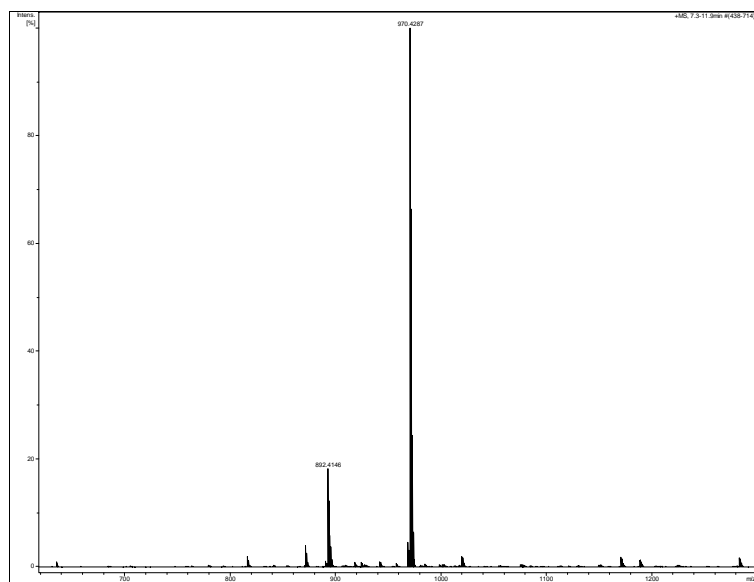

**Figure S12:** Ultra-high-resolution cryospray mass spectrum of  $[Fe^{III}(tBuTPP)(DMSO)_2]^+$  obtained at  $-30\text{ }^\circ\text{C}$  from the MeCN/DMSO (70:30) solvent mixture.

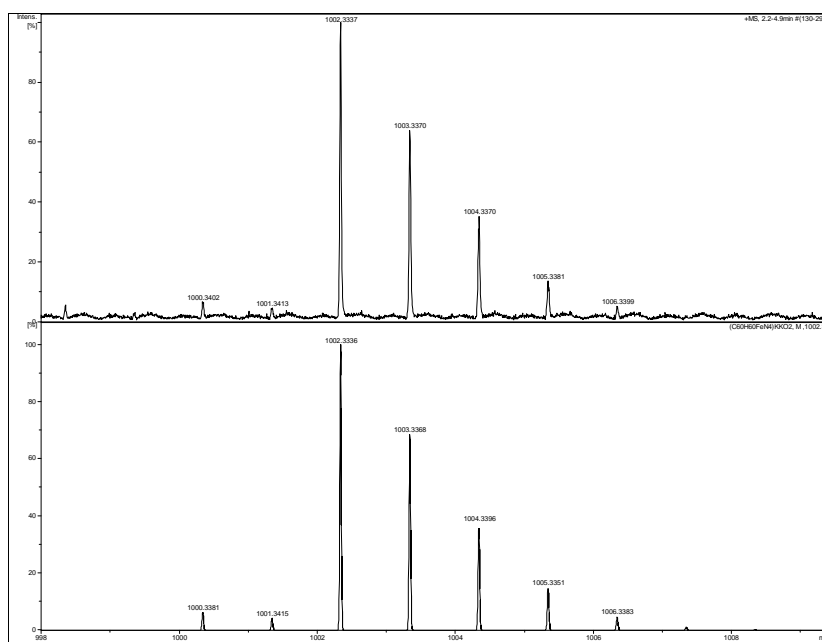

**Figure S13:** Comparison of measured and calculated isotopic distribution; above: ultra-high-resolution cryospray mass spectrum of  $\{K^+ + K[Fe^{III}(tBuTPP)(O_2^{2-})]\}$  obtained at  $-30\text{ }^\circ\text{C}$  from the reaction mixture in MeCN/DMSO (70:30); below: calculation of  $\{K^+ + K[Fe^{III}(tBuTPP)(O_2^{2-})]\}$  ( $C_{60}H_{60}FeN_4K_2O_2$ ).

### Kinetics and thermodynamics.

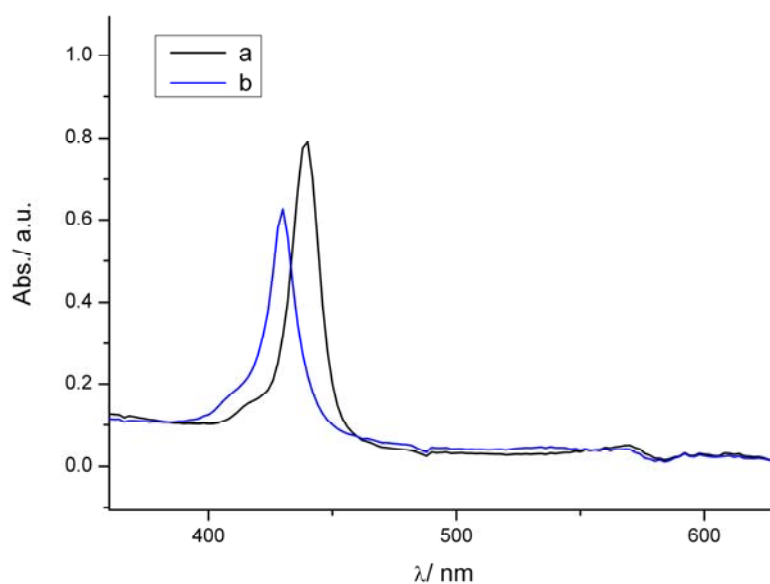

**Figure S14:** UV/vis spectra of:  $[Fe^{III}(tBuTPP)(O_2)]^-$  ( $10^{-5}\text{ M}$ ) in DMSO (a) and after bubbling of moist air resulting in spectrum of  $[Fe^{II}(tBuTPP)(DMSO)_n]$  (b).

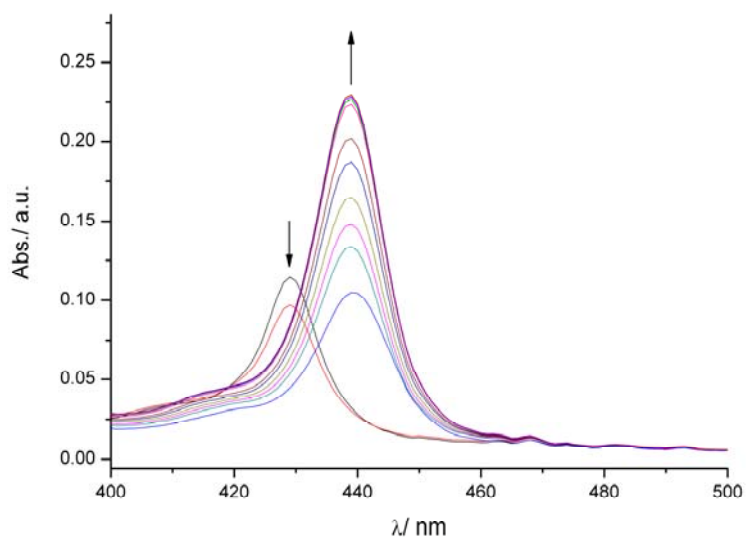

**Figure S15:** Titration of a solution of  $[\text{Fe}^{\text{II}}(\text{tBuTPP})(\text{DMSO})_n]$  ( $n = 1, 2$ ) ( $2 \times 10^{-6} \text{ M}$ ) with  $\text{O}_2^-$  in DMSO at  $25^\circ \text{C}$  ( $I = 0.1 \text{ M Bu}_4\text{NPF}_6$ ).

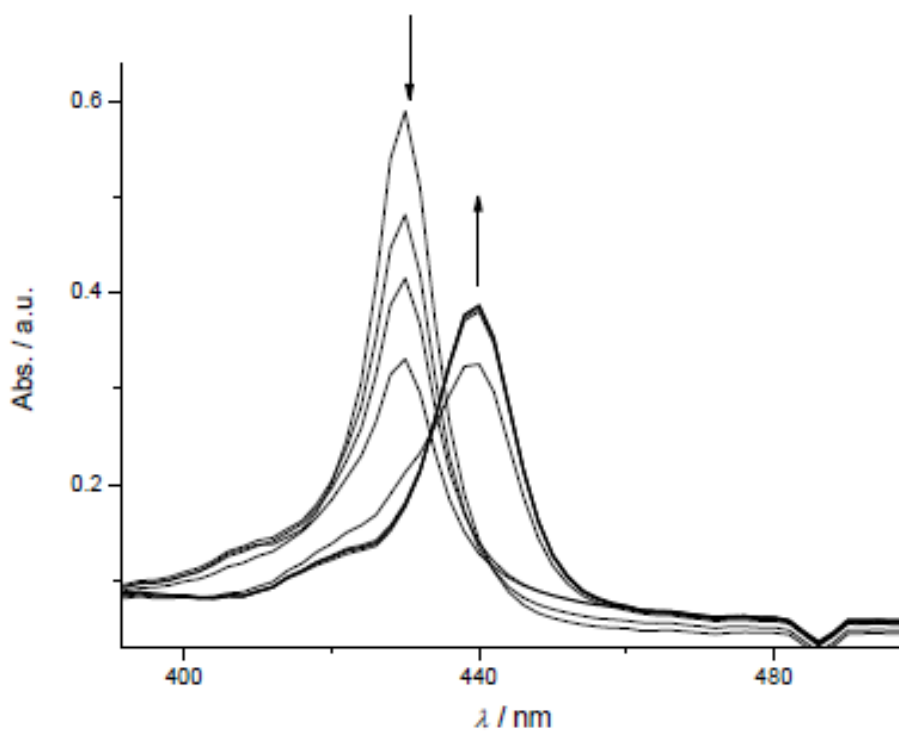

**Figure S16:** Titration of a solution of  $[\text{Fe}^{\text{II}}(\text{tBuTPP})(\text{DMSO})_n]$  ( $n = 1, 2$ ) ( $10^{-5} \text{ M}$ ) and 18-crown-6 ( $10^{-4} \text{ M}$ ) with  $\text{O}_2^-$  in DMSO at  $25^\circ \text{C}$  ( $I = 0.1 \text{ M TBAP}$ ).

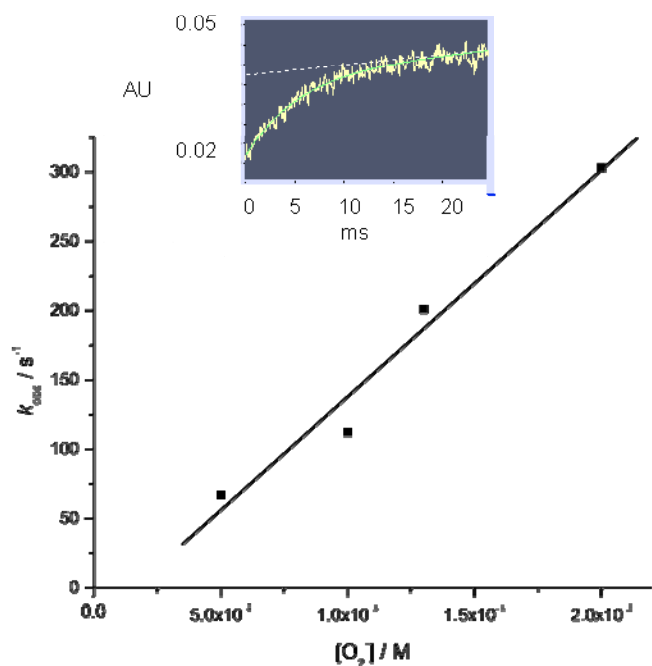

**Figure S17.** Plot of  $k_{\text{obs}}$  versus superoxide concentration for the reaction of  $[\text{Fe}^{\text{II}}(\text{tBuTPP})(\text{DMSO})_n]$  ( $n = 1, 2$ ) and  $\text{KO}_2$  at  $25^\circ \text{C}$  in the presence of ten-fold excess of 18-crown-6 using a micro cuvette stopped-flow setup and different mixing volume ratios ( $I = 0.1 \text{ M Bu}_4\text{NPF}_6$ ). Inset: Trace at 440 nm of the reaction of  $0.667 \cdot 10^{-5} \text{ M } [\text{Fe}^{\text{II}}(\text{tBuTPP})(\text{DMSO})_n]$  ( $n = 1, 2$ ) with  $0.667 \cdot 10^{-4} \text{ M}$  18-crown-6 and  $1.33 \cdot 10^{-3} \text{ M}$  solution of  $\text{KO}_2$  in DMSO ( $I = 0.1 \text{ M Bu}_4\text{NPF}_6$ ) and fit to a one exponential reaction.

**Table S3:** Superoxide concentrations and estimated  $k_{\text{obs}}$  values for the reaction of  $[\text{Fe}^{\text{II}}(\text{tBuTPP})(\text{DMSO})_n]$  ( $n = 1, 2$ ) and  $\text{KO}_2$  at  $25^\circ \text{C}$  in the presence of ten-fold excess of 18-crown-6 using a micro cuvette stopped-flow setup and different mixing volume ratios ( $I = 0.1 \text{ M Bu}_4\text{NPF}_6$ ).

| $[\text{O}_2^-] / \text{M}$ | $k_{\text{obs}} / \text{s}^{-1}$ | Mixing volume ratio,<br>complex : $\text{O}_2^-$        |
|-----------------------------|----------------------------------|---------------------------------------------------------|
| 0.002                       | $303 \pm$                        | micro cuvette, $[\text{O}_2^-] = 4 \text{ mM}$<br>1 : 1 |
| 0.0013                      | $201 \pm$                        | micro cuvette, $[\text{O}_2^-] = 4 \text{ mM}$<br>2 : 1 |
| 1E-3                        | $112 \pm$                        | $[\text{O}_2^-] = 2 \text{ mM}$<br>1 : 1                |
| 5E-4                        | $67 \pm$                         | $[\text{O}_2^-] = 1 \text{ mM}$<br>1 : 1                |

## EPR spectroscopy.

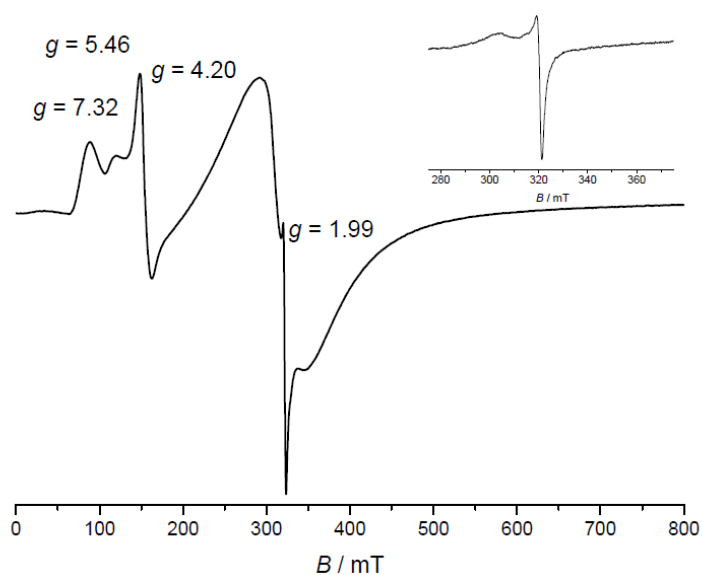

**Figure S18:** X-band EPR spectra of  $[\text{Fe}^{\text{III}}(\text{tBuTPP})\text{Cl}]$  with  $\text{KO}_2$  in DMSO, microwave frequency was 8.981173 GHz,  $P = 1$  mW; Mod. width = 1.0 mT, sweep width 800 mT at 12 K; inset shows spectra at 77 K, microwave frequency was 8.980376 GHz,  $P = 1$  mW; Mod. width = 1.0 mT, sweep width 100 mT.

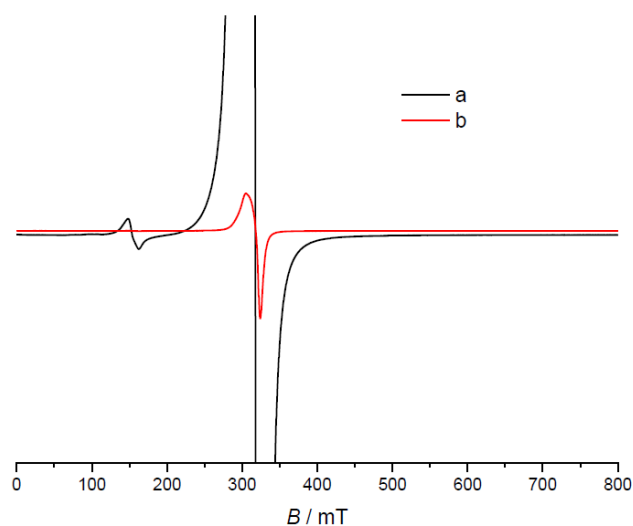

**Figure S19:** X-band EPR spectra of  $[\text{Fe}^{\text{III}}(\text{tBuTPP})\text{Cl}]$  with  $\text{KO}_2$  and ten-fold excess of 18-crown-6 in DMSO; a) at 12 K, microwave frequency was 8.985756 GHz,  $P = 1$  mW; Mod. width = 1.0 mT, sweep width 800 mT; b) at 77 K, microwave frequency was 8.984888 GHz,  $P = 1$  mW; Mod. width = 1.0 mT, sweep width 800 mT.

### High pressure UV/vis measurements

Sample preparation was done in an Ar MBraun glovebox. A sample of  $\text{K}[\text{Fe}^{\text{III}}(\text{tBuTPP})(\text{O}_2^{2-})]$  was prepared by addition of an excess of  $\text{KO}_2$  to a  $10^{-5}$  M solution of  $[\text{Fe}^{\text{III}}(\text{tBuTPP})\text{Cl}]$  in a dry DMSO solution of 0.1 M TBAP. The suspension was stirred for 30 min. High pressure UV/vis spectra were recorded after filtration.

Spectral measurements at elevated pressure were performed in a pill-box cuvette on a Shimadzu UV-2101-PC spectrophotometer using a home-made high-pressure cell.<sup>5</sup> The high-pressure pump was purchased from NOVA SWISS (Nova Werke AG, CH-8307 Effretikon, Vogelsangstrasse); it allows measurements up to 150 MPa.

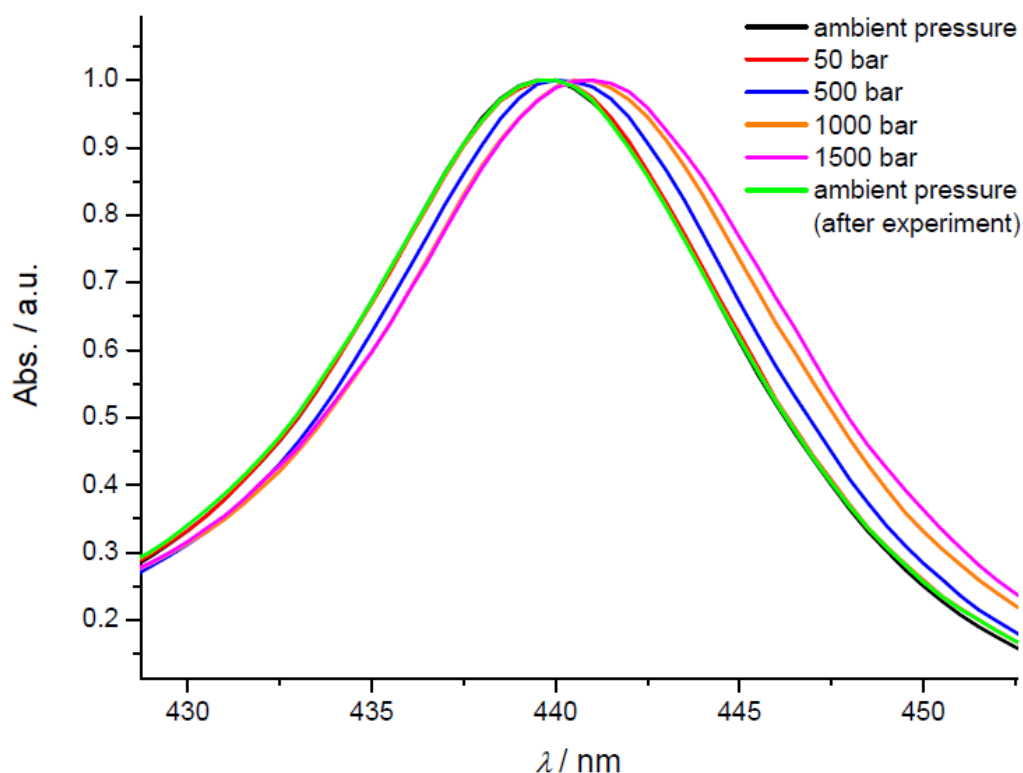

**Figure S20:** UV/vis spectra of  $\text{K}[\text{Fe}^{\text{III}}(\text{TBuTPP})(\text{O}_2^{2-})]$  ( $10^{-5}$  M) at  $35^\circ\text{C}$  with added 18-crown-6 ( $10^{-4}$  M) at different pressures in presence of 0.1 M TBAP.

### DFT calculations.

Geometry optimizations of the structures were performed with the Jaguar 6.0 program package<sup>7</sup> using the B3PW91 and B3LYP functionals, and a restricted open shell formalism. Standard DFT and pseudospectral grids were used throughout. The 6-31G(d) basis set was used on all atoms with the exception of the metal ions for which the standard Los Alamos effective core potentials<sup>8</sup> were used with the associated double- $\zeta$ , basis LACVP on potassium

and the triplet- $\zeta$  basis LACV3P<sup>9</sup> on iron. This combination is referred to as BSI. The calculated total energies of the optimized structures in vacuo, together with the total energy of the dissociated DMSO ligand, were used to compare the stability of the side-on and end-on complexes.

Optimized geometries and total energies of the investigated structures at the B3PW91/BSI level of theory

### DMSO (using 5d functionals)

**Total energy:** -553.07635583763

#### Cartesian coordinates:

|     |               |              |               |
|-----|---------------|--------------|---------------|
| O1  | 2.1226422801  | 2.8437532970 | -6.1976591981 |
| S2  | 1.9205496300  | 2.2541176913 | -4.8272057418 |
| C3  | 2.6549002898  | 3.4065044061 | -3.6174358257 |
| H4  | 3.7345662822  | 3.4064096728 | -3.7889061263 |
| H5  | 2.4437939204  | 3.0669700463 | -2.5983985123 |
| H6  | 2.2615283637  | 4.4146084388 | -3.7820143863 |
| C7  | 0.1879299889  | 2.5640472880 | -4.3445282648 |
| H8  | -0.0432346216 | 3.6272643470 | -4.4638361893 |
| H9  | -0.4425895935 | 1.9783375632 | -5.0186239587 |
| H10 | 0.0214224316  | 2.2421193436 | -3.3116343743 |

### Doublet end-on {Fe<sup>II</sup>(porphin) + O<sub>2</sub>}

**Total energy:** -1261.86561343358

#### Cartesian coordinates:

|     |               |               |               |
|-----|---------------|---------------|---------------|
| C1  | 4.9680701560  | 2.5782823744  | -0.2471418704 |
| C2  | 5.4856200204  | 1.6315467797  | -1.0731812081 |
| C3  | 4.3637855406  | 0.9011911809  | -1.6107602439 |
| C4  | 4.4820753917  | -0.1542521519 | -2.5011909766 |
| C5  | 3.4182617222  | -0.8523494688 | -3.0500532017 |
| C6  | 3.5647217934  | -1.9238965524 | -4.0042535317 |
| C7  | 2.3079754541  | -2.3365392767 | -4.3173793779 |
| C8  | 1.4039080414  | -1.5128209610 | -3.5530910560 |
| C9  | -2.2994238399 | -0.8786409440 | -3.0641864259 |
| C10 | 0.0230138036  | -1.6105019068 | -3.6176079675 |
| C11 | -2.8177317177 | 0.0856843652  | -2.2581396340 |
| C12 | -1.6967390050 | 0.7497543813  | -1.6400048941 |
| C13 | -1.8135973740 | 1.8056297205  | -0.7494694616 |
| C14 | -0.7494070444 | 2.4844359748  | -0.1764031382 |
| C15 | -0.8940485105 | 3.6061883325  | 0.7192355635  |
| C16 | 0.3638539442  | 3.9985330912  | 1.0517321032  |
| C17 | 1.2668544874  | 3.1159978066  | 0.3551768147  |
| C18 | -0.8660079232 | -0.7953359558 | -2.9342581418 |
| C19 | 2.6472842146  | 3.2163023580  | 0.4155786332  |
| C20 | 3.5352456110  | 2.4189957516  | -0.2877454902 |
| H21 | 5.4852018754  | -0.4484863209 | -2.8022545671 |
| H22 | 5.4916724214  | 3.3242306161  | 0.3406291940  |
| H23 | 6.5247189306  | 1.4322568985  | -1.3102192339 |
| H24 | 4.5132041507  | -2.2943222217 | -4.3776723863 |
| H25 | 2.0032311150  | -3.1192580887 | -5.0034135724 |
| H26 | -2.8228855276 | -1.5870919510 | -3.6967575193 |
| H27 | -3.8582542541 | 0.3377473653  | -2.0858255552 |
| H28 | -1.8419498211 | 4.0229108615  | 1.0410428644  |
| H29 | 0.6718062583  | 4.8102512382  | 1.7015334077  |
| H30 | 3.0662263948  | 3.9967103540  | 1.0470259346  |
| H31 | -0.3955895845 | -2.3679586374 | -4.2768360396 |



|      |               |               |               |
|------|---------------|---------------|---------------|
| N32  | -0.5126083327 | 0.2032639533  | -2.0628598702 |
| N33  | 0.5736248858  | 2.1987495539  | -0.3897683716 |
| N34  | 3.1811112262  | 1.3945485980  | -1.1257201335 |
| N35  | 2.0947317426  | -0.6115290910 | -2.7842061437 |
| O36  | 1.3175588003  | -0.5439751746 | -0.1084824362 |
| O37  | 1.8035852270  | -0.1654963804 | 1.0298679540  |
| Fe38 | 1.3330380717  | 0.7063522820  | -1.4726797733 |
| H39  | -2.8174389147 | 2.1402737833  | -0.4973451573 |

### Quartet end-on {Fe<sup>II</sup>(porphin) + O<sub>2</sub>}

Total energy: -1261.85893474629

#### Cartesian coordinates:

|      |               |               |               |
|------|---------------|---------------|---------------|
| C1   | 4.9607880271  | 2.5064602167  | -0.2013793341 |
| C2   | 5.4831244004  | 1.5997558130  | -1.0727035390 |
| C3   | 4.3648376908  | 0.9183731698  | -1.6711421397 |
| C4   | 4.4776359004  | -0.1180984885 | -2.5877859912 |
| C5   | 3.4151324815  | -0.8296605881 | -3.1187586644 |
| C6   | 3.5589599277  | -1.9244907580 | -4.0432265652 |
| C7   | 2.3023230954  | -2.3716906496 | -4.3122591281 |
| C8   | 1.3964946316  | -1.5407919675 | -3.5581696823 |
| C9   | -2.3125351212 | -0.9290402484 | -3.0415322769 |
| C10  | 0.0133083895  | -1.6568191745 | -3.5994385981 |
| C11  | -2.8356680407 | 0.0681357235  | -2.2767306339 |
| C12  | -1.7191406767 | 0.7658411117  | -1.6932291637 |
| C13  | -1.8370072847 | 1.8402703190  | -0.8265356934 |
| C14  | -0.7736019433 | 2.5100149490  | -0.2358371468 |
| C15  | -0.9119879158 | 3.5805386791  | 0.7172488769  |
| C16  | 0.3494932977  | 3.9330151044  | 1.0887568248  |
| C17  | 1.2479080989  | 3.0793239584  | 0.3543397378  |
| C18  | -0.8789604209 | -0.8288083814 | -2.9298320468 |
| C19  | 2.6307463640  | 3.1296215446  | 0.4605376433  |
| C20  | 3.5282761589  | 2.3738895434  | -0.2811782565 |
| H21  | 5.4798917979  | -0.4123971124 | -2.8911966101 |
| H22  | 5.4859016520  | 3.1964765052  | 0.4494544582  |
| H23  | 6.5249809012  | 1.3959426227  | -1.2921501062 |
| H24  | 4.5040795822  | -2.2970499025 | -4.4221424325 |
| H25  | 2.0020031878  | -3.1859055133 | -4.9623419605 |
| H26  | -2.8373030221 | -1.6690372275 | -3.6354366607 |
| H27  | -3.8781813471 | 0.3121434305  | -2.1070342009 |
| H28  | -1.8557238650 | 3.9916294378  | 1.0572840273  |
| H29  | 0.6562667802  | 4.6914785073  | 1.8000851227  |
| H30  | 3.0482383795  | 3.8452716887  | 1.1651912894  |
| H31  | -0.4048090752 | -2.4425161291 | -4.2242304918 |
| N32  | -0.5354993171 | 0.2018528043  | -2.0985498516 |
| N33  | 0.5481346792  | 2.2272579515  | -0.4528168780 |
| N34  | 3.1831985661  | 1.4144609600  | -1.1892898468 |
| N35  | 2.0895020625  | -0.6128137700 | -2.8307110493 |
| O36  | 1.4582063786  | -0.4485570285 | 0.1983852819  |
| O37  | 1.9213771351  | -0.0457622799 | 1.3373163265  |
| Fe38 | 1.3246062973  | 0.7357036865  | -1.5399021359 |
| H39  | -2.8418804032 | 2.1712930939  | -0.5730830239 |

### Sextet end-on {Fe<sup>II</sup>(porphin) + O<sub>2</sub>}

Total energy: -1261.86370914682

#### Cartesian coordinates:

|    |              |               |               |
|----|--------------|---------------|---------------|
| C1 | 4.8680651649 | 2.3867322331  | 0.2068114541  |
| C2 | 5.4104473064 | 1.4103097929  | -0.5746180354 |
| C3 | 4.3038471315 | 0.7205005831  | -1.2055593259 |
| C4 | 4.4188230560 | -0.3257429864 | -2.1269157857 |
| C5 | 3.3789882440 | -0.9608118056 | -2.8139171637 |
| C6 | 3.5496174773 | -1.9934522398 | -3.8146260264 |

|      |               |               |               |
|------|---------------|---------------|---------------|
| C7   | 2.3036204965  | -2.3132767996 | -4.2651328282 |
| C8   | 1.3712177067  | -1.4750860574 | -3.5420194740 |
| C9   | -2.3611468481 | -0.5726692110 | -3.4376575341 |
| C10  | -0.0131603526 | -1.4581237917 | -3.7381845759 |
| C11  | -2.9010764887 | 0.4121929500  | -2.6656147710 |
| C12  | -1.8171167661 | 0.9674859964  | -1.8816138328 |
| C13  | -1.9303153921 | 2.0425864299  | -0.9930666061 |
| C14  | -0.8950629476 | 2.6629937694  | -0.2867752395 |
| C15  | -1.0434061483 | 3.8214372734  | 0.5692687150  |
| C16  | 0.2012143478  | 4.1284749897  | 1.0324260536  |
| C17  | 1.1117405401  | 3.1625540156  | 0.4549072741  |
| C18  | -0.9485262306 | -0.6194690488 | -3.1237245166 |
| C19  | 2.4978580092  | 3.1536065188  | 0.6411277944  |
| C20  | 3.4312568403  | 2.2950367358  | 0.0503291399  |
| H21  | 5.4279834185  | -0.6623982580 | -2.3564778456 |
| H22  | 5.3851495239  | 3.1136854539  | 0.8237341334  |
| H23  | 6.4594907144  | 1.1774872423  | -0.7220141917 |
| H24  | 4.5012266077  | -2.4081749140 | -4.1289855652 |
| H25  | 2.0324277990  | -3.0397534281 | -5.0234630635 |
| H26  | -2.8620533521 | -1.2031401426 | -4.1643260121 |
| H27  | -3.9327508645 | 0.7444385684  | -2.6305853286 |
| H28  | -1.9791733901 | 4.3275732018  | 0.7802726251  |
| H29  | 0.4867663538  | 4.9385710976  | 1.6947194668  |
| H30  | 2.8993816952  | 3.9233581995  | 1.2977831647  |
| H31  | -0.4033267923 | -2.1548443291 | -4.4779555341 |
| N32  | -0.6601712288 | 0.3120314477  | -2.1724126710 |
| N33  | 0.4145701031  | 2.2902690351  | -0.3270993065 |
| N34  | 3.1289543586  | 1.2719971294  | -0.7963636541 |
| N35  | 2.0536592605  | -0.6784388286 | -2.6710710084 |
| O36  | 0.9918401518  | -0.7453858836 | 0.2862205804  |
| O37  | 0.9116124651  | -1.4936384762 | 1.3393862321  |
| Fe38 | 1.1847970015  | 0.5030156134  | -1.1473823984 |
| H39  | -2.9260326330 | 2.4619483739  | -0.8627525991 |

### Doublet side-on {Fe<sup>II</sup>(porphin) + O<sub>2</sub>}

Total energy: -1261.85078531366

#### Cartesian coordinates:

|     |               |               |                |
|-----|---------------|---------------|----------------|
| C1  | 1.0278417715  | 3.4928976073  | 0.1940754815   |
| C2  | 0.0418175964  | 4.4288905106  | 0.6756925275   |
| C3  | -0.6943382060 | -1.0205592004 | -2.5169955119  |
| C4  | 2.3861431712  | 3.5705090467  | 0.4842992327   |
| C5  | 3.3432924215  | 2.6434870318  | 0.0978918249   |
| C6  | 4.7634456988  | 2.8170928470  | 0.3091035103   |
| C7  | 5.3773544198  | 1.7944816359  | -0.3408325782  |
| C8  | 4.3281302929  | 1.0045518142  | -0.9461082600  |
| C9  | 4.5605797175  | -0.0387795899 | -1.8307312254  |
| C10 | 3.5807729719  | -0.7246138772 | -2.5407286775  |
| C11 | 3.8469414756  | -1.8444665185 | -3.4099416167  |
| C12 | 2.6346739040  | -2.3289385266 | -3.7963129277  |
| C13 | 1.6418499574  | -1.4998657498 | -3.1577862945  |
| C14 | -2.1165628362 | -1.2405488498 | -2.6583939974  |
| C15 | 0.2752117915  | -1.7571734888 | -3.1831136291  |
| C16 | -2.7317059684 | -0.2340094043 | -1.98444448409 |
| C17 | -1.6814823902 | 0.5958744219  | -1.4370502360  |
| C18 | -1.1723264274 | 3.9295009852  | 0.3143488062   |
| C19 | -1.9027459237 | 1.8133648300  | -0.8088472155  |
| C20 | -0.9134327890 | 2.6956609188  | -0.3869509250  |
| H21 | 5.5952019485  | -0.3310019602 | -1.9980279681  |
| H22 | -3.7931091240 | -0.0389676532 | -1.8780974007  |
| H23 | -2.1578584546 | 4.3324598292  | 0.5203881208   |
| H24 | 0.2634866771  | 5.3266446699  | 1.2424531525   |
| H25 | 2.7270420960  | 4.4312592529  | 1.0558344754   |

|      |               |               |               |
|------|---------------|---------------|---------------|
| H26  | -0.0619649204 | -2.6009216129 | -3.7813813242 |
| H27  | 5.2118250070  | 3.6365588138  | 0.8602168022  |
| H28  | 6.4382726797  | 1.5928305550  | -0.4390316857 |
| H29  | 4.8351050377  | -2.2166960594 | -3.6575449757 |
| H30  | 2.4177633235  | -3.1825652710 | -4.4287507371 |
| H31  | -2.5639009245 | -2.0504185923 | -3.2240699414 |
| N32  | 0.4291052934  | 2.4798846834  | -0.4955407033 |
| N33  | 3.1001150544  | 1.5090512999  | -0.6239386568 |
| N34  | 2.2383624222  | -0.4996068317 | -2.4473789952 |
| N35  | -0.4559583379 | 0.0716317609  | -1.7333366023 |
| O36  | 1.5517611362  | -0.8105046385 | 0.0901893476  |
| O37  | 0.9224710121  | 0.2088729114  | 0.7551084577  |
| Fe38 | 1.3084572401  | 0.6914409473  | -1.0396580350 |
| H39  | -2.9363423359 | 2.1087539016  | -0.6434328563 |

### Quartet side-on {Fe<sup>II</sup>(porphin) + O<sub>2</sub>}

Total energy: -1261.86678542276

#### Cartesian coordinates:

|      |                |               |               |
|------|----------------|---------------|---------------|
| C1   | 0.8111800646   | 3.5535759854  | 0.4922969190  |
| C2   | -0.2091972650  | 4.4692226464  | 0.9554413810  |
| C3   | -0.7869781038  | -0.8345256600 | -2.5566924713 |
| C4   | 2.1740505669   | 3.7104084274  | 0.7511432459  |
| C5   | 3.1993469018   | 2.8777603147  | 0.3060847540  |
| C6   | 4.6115951024   | 3.0960099304  | 0.5310166723  |
| C7   | 5.2658805489   | 2.0875172201  | -0.1106955104 |
| C8   | 4.2475834184   | 1.2612231019  | -0.7211637597 |
| C9   | 4.4874000109   | 0.1436193079  | -1.5208186924 |
| C10  | 3.5241981996   | -0.6273268239 | -2.1722232283 |
| C11  | 3.8315550803   | -1.7422756801 | -3.0395976657 |
| C12  | 2.6404102708   | -2.2357170709 | -3.4750009812 |
| C13  | 1.6097514045   | -1.4212258772 | -2.8720923756 |
| C14  | -2.1946968958  | -1.0107776770 | -2.8415144037 |
| C15  | 0.2437290893   | -1.6201808004 | -3.0705966368 |
| C16  | -2.84744461935 | -0.0032701785 | -2.1969982020 |
| C17  | -1.8327381768  | 0.7798446738  | -1.5256757862 |
| C18  | -1.3996437612  | 3.9727319209  | 0.5215920503  |
| C19  | -2.0666325033  | 1.9440514740  | -0.7947308656 |
| C20  | -1.0987136811  | 2.7574804508  | -0.2042010652 |
| H21  | 5.5262200538   | -0.1421220329 | -1.6728970856 |
| H22  | -3.9116407900  | 0.2042801095  | -2.1817082234 |
| H23  | -2.3937598666  | 4.3793942857  | 0.6717691103  |
| H24  | -0.0247717239  | 5.3679004698  | 1.5339401556  |
| H25  | 2.4630970485   | 4.5766564540  | 1.3427667648  |
| H26  | -0.0403953130  | -2.4505891809 | -3.7136656211 |
| H27  | 5.0368143454   | 3.9183059320  | 1.0960224564  |
| H28  | 6.3345222357   | 1.9158870998  | -0.1768167244 |
| H29  | 4.8309726851   | -2.0879735985 | -3.2796861471 |
| H30  | 2.4619295090   | -3.0672543823 | -4.1473513121 |
| H31  | -2.6158547045  | -1.7945604789 | -3.4617868472 |
| N32  | 0.2467608690   | 2.5352370270  | -0.2176881402 |
| N33  | 3.0114868358   | 1.7592678145  | -0.4452470429 |
| N34  | 2.1723694731   | -0.4477970127 | -2.0962156914 |
| N35  | -0.6012244469  | 0.2473801551  | -1.7528275973 |
| O36  | 1.1908580900   | -0.9180725851 | 0.5124667082  |
| O37  | 0.8950093314   | 0.2279275154  | 1.2573138245  |
| Fe38 | 1.1773930064   | 0.5870833799  | -0.5222979715 |
| H39  | -3.1024327128  | 2.2591205028  | -0.6867715443 |

### Sextet side-on {Fe<sup>II</sup>(porphin) + O<sub>2</sub><sup>-</sup>}

Total energy: -1261.88561546787

#### Cartesian coordinates:

|      |               |               |               |
|------|---------------|---------------|---------------|
| C1   | 1.0081771619  | 3.4896665042  | 0.2757878038  |
| C2   | 0.0143036968  | 4.4219373321  | 0.7704503791  |
| C3   | -0.7245570945 | -0.9238871899 | -2.7022939873 |
| C4   | 2.3900387627  | 3.6266730702  | 0.4387759296  |
| C5   | 3.3838668088  | 2.7787998588  | -0.0612779755 |
| C6   | 4.8072844973  | 3.0184578063  | 0.0472883036  |
| C7   | 5.4250788990  | 2.0032002431  | -0.6205440579 |
| C8   | 4.3765551538  | 1.1471876178  | -1.1332092093 |
| C9   | 4.5836799403  | 0.0160595856  | -1.9295316995 |
| C10  | 3.6030006496  | -0.7829680506 | -2.5247888747 |
| C11  | 3.8669791118  | -1.9274649497 | -3.3749768295 |
| C12  | 2.6532836794  | -2.4214100622 | -3.7463207029 |
| C13  | 1.6549011276  | -1.5753152627 | -3.1219054801 |
| C14  | -2.1431427880 | -1.0677935076 | -2.9517195385 |
| C15  | 0.2723548522  | -1.7359049353 | -3.2536014984 |
| C16  | -2.7600850557 | -0.0474972465 | -2.2905623751 |
| C17  | -1.7153072448 | 0.7147995955  | -1.6399442220 |
| C18  | -1.1986782876 | 3.9316861744  | 0.3911679371  |
| C19  | -1.9202263124 | 1.8842680377  | -0.9001471023 |
| C20  | -0.9385702112 | 2.7022910135  | -0.3323509081 |
| H21  | 5.6191762195  | -0.2534622201 | -2.1305336676 |
| H22  | -3.8202191696 | 0.1792953024  | -2.2498852186 |
| H23  | -2.1803011619 | 4.3530941144  | 0.5805563420  |
| H24  | 0.2257150906  | 5.3263723370  | 1.3311382921  |
| H25  | 2.7309990576  | 4.5034062880  | 0.9868623802  |
| H26  | -0.0643729772 | -2.5632694929 | -3.8760011954 |
| H27  | 5.2638640298  | 3.8617272706  | 0.5546279816  |
| H28  | 6.4884547488  | 1.8483179735  | -0.7679754135 |
| H29  | 4.8514301208  | -2.2955351430 | -3.6441408986 |
| H30  | 2.4431217261  | -3.2750321715 | -4.3817417095 |
| H31  | -2.5973179333 | -1.8424903092 | -3.5604513084 |
| N32  | 0.3999079813  | 2.4698892946  | -0.3861852922 |
| N33  | 3.1596953640  | 1.6344134010  | -0.7647591694 |
| N34  | 2.2620881183  | -0.5978364703 | -2.3979785752 |
| N35  | -0.5029400569 | 0.1512973661  | -1.8967452733 |
| O36  | 1.5165799010  | -1.0652744718 | 0.4785518751  |
| O37  | 0.9161522977  | -0.0576225827 | 1.1304503029  |
| Fe38 | 1.3086341684  | 0.5496858880  | -0.8209219737 |
| H39  | -2.9529083327 | 2.2033608147  | -0.7724744135 |

**Doublet end-on {Fe<sup>II</sup>(porphin) + O<sub>2</sub><sup>-</sup> + DMSO}**

**Total energy:** -1814.94784088973

**Cartesian coordinates:**

|     |               |               |               |
|-----|---------------|---------------|---------------|
| C1  | 5.0455963148  | 2.3194004187  | 0.1282364201  |
| C2  | 5.5765696075  | 1.3667058415  | -0.6815795188 |
| C3  | 4.4647037668  | 0.7470967073  | -1.3663680022 |
| C4  | 4.6009264251  | -0.2687985450 | -2.3018869597 |
| C5  | 3.5557366440  | -0.8681913036 | -2.9894777673 |
| C6  | 3.7277627818  | -1.9157282264 | -3.9690800652 |
| C7  | 2.4831018438  | -2.2388359049 | -4.4102173078 |
| C8  | 1.5628890793  | -1.3833010785 | -3.6966918245 |
| C9  | -2.1463764758 | -0.6089632204 | -3.4352295165 |
| C10 | 0.1856485065  | -1.4015576405 | -3.8791328661 |
| C11 | -2.6797905283 | 0.3521564894  | -2.6318681031 |
| C12 | -1.5754825718 | 0.9745822715  | -1.9453951516 |
| C13 | -1.7050595451 | 2.0037380062  | -1.0230180339 |
| C14 | -0.6556122032 | 2.6099088693  | -0.3445433984 |
| C15 | -0.8204146454 | 3.6835133852  | 0.6083526794  |
| C16 | 0.4250183887  | 3.9958278960  | 1.0550036224  |
| C17 | 1.3402691315  | 3.1110526247  | 0.3739053296  |
| C18 | -0.7191722256 | -0.5670820013 | -3.2336231634 |
| C19 | 2.7144180203  | 3.1162169536  | 0.5643542014  |

|      |               |               |               |
|------|---------------|---------------|---------------|
| C20  | 3.6147016753  | 2.2733516593  | -0.0695030286 |
| H21  | 5.6082914203  | -0.6196530958 | -2.5176871288 |
| H22  | 5.5573517193  | 2.9982889864  | 0.8017836875  |
| H23  | 6.6172214157  | 1.0933680094  | -0.8178607820 |
| H24  | 4.6822958604  | -2.3378659049 | -4.2650255114 |
| H25  | 2.1960446437  | -2.9825981795 | -5.1461169735 |
| H26  | -2.6580538321 | -1.2970578864 | -4.0998865247 |
| H27  | -3.7222947627 | 0.6195560270  | -2.4988523760 |
| H28  | -1.7720848856 | 4.1206442279  | 0.8905888833  |
| H29  | 0.7154365030  | 4.7449278170  | 1.7837447556  |
| H30  | 3.1184432971  | 3.8374106889  | 1.2720850305  |
| H31  | -0.2173978907 | -2.1296866100 | -4.5806917520 |
| N32  | -0.3864064514 | 0.4118581647  | -2.3322723668 |
| N33  | 0.6651094309  | 2.2806792785  | -0.4767353891 |
| N34  | 3.2824548465  | 1.3094701450  | -0.9777763775 |
| N35  | 2.2332399406  | -0.5541354380 | -2.8401070162 |
| O36  | 1.1893848973  | -0.4803411485 | -0.2933098526 |
| O37  | 1.5657756189  | -0.1873335535 | 0.9193137805  |
| Fe38 | 1.4493449922  | 0.8399412282  | -1.6022630210 |
| O39  | 1.8626530223  | 2.3214518295  | -3.1745228902 |
| S40  | 0.6575237653  | 2.8334262137  | -3.9466841062 |
| C41  | 1.2299048577  | 4.4206151698  | -4.6338008367 |
| C42  | 0.6334358508  | 1.9237795329  | -5.5234877141 |
| H43  | -0.1495399697 | 2.3293869997  | -6.1736533740 |
| H44  | 0.4841808334  | 4.8252907900  | -5.3263995350 |
| H45  | 2.1911197828  | 4.2718462286  | -5.1358327391 |
| H46  | 1.3611158001  | 5.1003628721  | -3.7880642882 |
| H47  | 1.6172279685  | 1.9892874547  | -5.9989940294 |
| H48  | 0.4132892716  | 0.8827247098  | -5.2716882678 |
| H49  | -2.7106920649 | 2.3610904902  | -0.8110275939 |

### Quartet end-on {Fe<sup>II</sup>(porphin) + O<sub>2</sub><sup>-</sup> + DMSO}

**Total energy:** -1814.93361477866

#### Cartesian coordinates:

|     |               |               |               |
|-----|---------------|---------------|---------------|
| C1  | 5.0530743761  | 2.3909360212  | 0.1040025256  |
| C2  | 5.6064114587  | 1.3610600039  | -0.5912934597 |
| C3  | 4.5181148518  | 0.6892879415  | -1.2617025413 |
| C4  | 4.6644212851  | -0.4169567465 | -2.0879732851 |
| C5  | 3.6322540684  | -1.0519385008 | -2.7661604729 |
| C6  | 3.8133194131  | -2.1748112419 | -3.6547436591 |
| C7  | 2.5846104664  | -2.4771838266 | -4.1523270925 |
| C8  | 1.6572886507  | -1.5414299371 | -3.5590098244 |
| C9  | -2.0544243300 | -0.6915576021 | -3.5357113385 |
| C10 | 0.2948719194  | -1.5243314248 | -3.8297342719 |
| C11 | -2.6185192009 | 0.2875598294  | -2.7714904997 |
| C12 | -1.5396315953 | 0.9310735673  | -2.0672962738 |
| C13 | -1.6908458900 | 1.9843870114  | -1.1713341363 |
| C14 | -0.6558098835 | 2.6135157915  | -0.4935502921 |
| C15 | -0.8360152602 | 3.7412813500  | 0.3889420187  |
| C16 | 0.4039644155  | 4.0976933750  | 0.8195422211  |
| C17 | 1.3354598151  | 3.1803132498  | 0.2063949740  |
| C18 | -0.6350479843 | -0.6449013580 | -3.2835557545 |
| C19 | 2.7101030472  | 3.2235071190  | 0.4028042834  |
| C20 | 3.6303043782  | 2.3362650802  | -0.1407951056 |
| H21 | 5.6698271502  | -0.8082776927 | -2.2275973409 |
| H22 | 5.5459297613  | 3.1236846343  | 0.7342141649  |
| H23 | 6.6492701994  | 1.0703970500  | -0.6544339634 |
| H24 | 4.7651707069  | -2.6497944157 | -3.8656535342 |
| H25 | 2.3117527760  | -3.2592796367 | -4.8525560747 |
| H26 | -2.5467313405 | -1.4026280258 | -4.1905296727 |
| H27 | -3.6660902637 | 0.5544403290  | -2.6819516137 |
| H28 | -1.7926004667 | 4.1905621881  | 0.6330653231  |

|      |               |               |               |
|------|---------------|---------------|---------------|
| H29  | 0.6802541120  | 4.8991096100  | 1.4966859067  |
| H30  | 3.0953064962  | 4.0052350218  | 1.0546271924  |
| H31  | -0.0813367133 | -2.2771424666 | -4.5198276132 |
| N32  | -0.3412646407 | 0.3618495892  | -2.4058902969 |
| N33  | 0.6724725479  | 2.2851508834  | -0.5884531199 |
| N34  | 3.3293186779  | 1.2961287373  | -0.9717699349 |
| N35  | 2.3146467343  | -0.6876822561 | -2.7155151503 |
| O36  | 0.9118819590  | -0.8225673578 | -0.1635194364 |
| O37  | 1.5458633000  | -0.2431176703 | 0.8088300583  |
| Fe38 | 1.4927734928  | 0.7498840541  | -1.5993190688 |
| O39  | 1.8998163206  | 2.3267589226  | -3.5733598498 |
| S40  | 0.6719719720  | 3.1819555046  | -3.7753378939 |
| C41  | 1.2755054602  | 4.7476988212  | -4.5029156793 |
| C42  | -0.1540901956 | 2.5762903556  | -5.2818215869 |
| H43  | -0.9765655612 | 3.2479956809  | -5.5496917863 |
| H44  | 0.4308446888  | 5.3860961488  | -4.7900200207 |
| H45  | 1.9139736377  | 4.5318684338  | -5.3656742712 |
| H46  | 1.8666228712  | 5.2425925396  | -3.7274924144 |
| H47  | 0.5723926176  | 2.5003603354  | -6.0959310327 |
| H48  | -0.5452633062 | 1.5850179489  | -5.0393227490 |
| H49  | -2.7001277739 | 2.3490612705  | -0.9913657460 |

### Doublet end-on {Fe<sup>II</sup>(porphin) + O<sub>2</sub> + K<sup>+</sup>}

Total energy: -1290.03343319176

#### Cartesian coordinates:

|      |               |               |               |
|------|---------------|---------------|---------------|
| C1   | -0.6474445400 | -0.6292251160 | -3.2673514919 |
| C2   | 2.7535578782  | 3.4717621674  | 0.0839545627  |
| C3   | 3.6400784330  | 2.8499437450  | -0.7794423132 |
| C4   | 5.0507562810  | 3.1499520042  | -0.8389123859 |
| C5   | 5.5711263501  | 2.3663353284  | -1.8163947994 |
| C6   | 4.4775022222  | 1.5843323655  | -2.3421061173 |
| C7   | 4.6106135919  | 0.6338451923  | -3.3415274315 |
| C8   | 3.5782831480  | -0.1461816916 | -3.8390720361 |
| C9   | 3.7380567751  | -1.1436395910 | -4.8697515566 |
| C10  | 2.5156878863  | -1.7014438313 | -5.0607632153 |
| C11  | 1.6138688856  | -1.0345675468 | -4.1523372924 |
| C12  | -2.0702482189 | -0.8401216566 | -3.2977305373 |
| C13  | 0.2585982653  | -1.3102311132 | -4.0676300005 |
| C14  | -2.6198874002 | 0.0670873915  | -2.4422350467 |
| C15  | -1.5264419877 | 0.8199472134  | -1.8838171160 |
| H16  | 5.6011440995  | 0.4834977426  | -3.7623590982 |
| C17  | -1.6694302018 | 1.8248813883  | -0.9313984551 |
| C18  | -0.6172385433 | 2.5413323534  | -0.3719491846 |
| C19  | -0.7795698963 | 3.5656036581  | 0.6315031901  |
| O20  | 1.9007147550  | -0.2970183904 | -0.7448087856 |
| C21  | 0.4696860631  | 4.0070123255  | 0.9360403500  |
| C22  | 1.3848666266  | 3.2597285354  | 0.1112562697  |
| H23  | 5.5552989439  | 3.8745667261  | -0.2112039455 |
| H24  | 6.5959566401  | 2.3053192515  | -2.1614249447 |
| H25  | 4.6713324644  | -1.3721932417 | -5.3701052854 |
| H26  | 2.2286869919  | -2.4826559351 | -5.7544635985 |
| H27  | -2.5758145291 | -1.5669213496 | -3.9227484127 |
| H28  | -3.6671705437 | 0.2384035504  | -2.2214657744 |
| H29  | -1.7313451109 | 3.9034090895  | 1.0251954922  |
| H30  | 0.7586105074  | 4.7834645499  | 1.6344984944  |
| K31  | -0.3182630256 | -0.6003630822 | 0.5263031433  |
| N32  | -0.3222000338 | 0.3747392436  | -2.3849885710 |
| N33  | 0.7118042710  | 2.3593815461  | -0.6737854048 |
| N34  | 3.3070016722  | 1.8992518249  | -1.7064082539 |
| N35  | 2.2774569505  | -0.0867457596 | -3.4176318816 |
| O36  | 2.2260436937  | 0.0521082073  | 0.4873670423  |
| Fe37 | 1.5474590265  | 1.0388264702  | -1.9483022865 |

|     |               |               |               |
|-----|---------------|---------------|---------------|
| H38 | 3.1579196143  | 4.2161241588  | 0.7648723246  |
| H39 | -0.1364147849 | -2.0852998819 | -4.7193308349 |
| H40 | -2.6789609416 | 2.0873556290  | -0.6234774887 |

### Sextet side-on {Fe<sup>II</sup>(porphin) + O<sub>2</sub><sup>-</sup> + K<sup>+</sup>}

Total energy: -1290.05417492550

#### Cartesian coordinates:

|      |               |               |               |
|------|---------------|---------------|---------------|
| C1   | 1.1807515726  | 3.8000500248  | 0.0024601802  |
| C2   | 0.2040145084  | 4.6796173418  | 0.6117068291  |
| C3   | -0.6362993661 | -0.5910579606 | -2.9552826326 |
| C4   | 2.5644645291  | 3.9554131014  | 0.1007349757  |
| C5   | 3.5352604720  | 3.1393487093  | -0.4786364151 |
| C6   | 4.9586909596  | 3.3824363616  | -0.4235184017 |
| C7   | 5.5529529075  | 2.4014707629  | -1.1563464621 |
| C8   | 4.4932242869  | 1.5576664409  | -1.6597811007 |
| C9   | 4.6785448718  | 0.4640388441  | -2.5048234574 |
| C10  | 3.6788225289  | -0.3270013703 | -3.0732584529 |
| C11  | 3.9152600303  | -1.4515183350 | -3.9554909413 |
| C12  | 2.6955517183  | -1.9689674554 | -4.2605431514 |
| C13  | 1.7171621709  | -1.1575934689 | -3.5649083659 |
| C14  | -2.0585231186 | -0.8092849983 | -3.0395749717 |
| C15  | 0.3395811933  | -1.3700140860 | -3.5915799020 |
| C16  | -2.6575078182 | 0.1808684102  | -2.3029191091 |
| C17  | -1.5990442503 | 1.0019223109  | -1.7708658322 |
| C18  | -1.0196734398 | 4.1708780198  | 0.3079723603  |
| C19  | -1.7843487491 | 2.1441626541  | -0.9812231816 |
| C20  | -0.7865074603 | 2.9822686079  | -0.4868470750 |
| H21  | 5.7053761850  | 0.2137590229  | -2.7596496590 |
| H22  | -3.7183031263 | 0.3631311912  | -2.1718037340 |
| H23  | -1.9936188700 | 4.5567383006  | 0.5855376836  |
| H24  | 0.4372304240  | 5.5647635685  | 1.1916360457  |
| H25  | 2.9222715591  | 4.8091938642  | 0.6707220130  |
| H26  | -0.0177322869 | -2.2030950247 | -4.1925584249 |
| H27  | 5.4296173427  | 4.2073836846  | 0.0977682027  |
| H28  | 6.6086580403  | 2.2613332751  | -1.3560678510 |
| H29  | 4.8895211712  | -1.7888966784 | -4.2890531549 |
| H30  | 2.4675361452  | -2.8147640350 | -4.8986574382 |
| H31  | -2.5383162942 | -1.5875130415 | -3.6228028111 |
| K32  | -0.7170054341 | -1.4002366056 | 0.0887345608  |
| N33  | -0.3855392799 | 0.4964219628  | -2.1595937497 |
| N34  | 0.5520301875  | 2.7960443101  | -0.6660638755 |
| N35  | 3.2858518678  | 2.0206526272  | -1.2209662871 |
| N36  | 2.3433656311  | -0.1658506216 | -2.8700170504 |
| O37  | 1.7218907976  | -0.6914859978 | -0.1987164433 |
| O38  | 1.0816998450  | 0.3516440897  | 0.5769095786  |
| Fe39 | 1.4945415713  | 0.9370341557  | -1.2225991902 |
| H40  | -2.8127626744 | 2.4193622860  | -0.7584523623 |

### Doublet end-on {Fe<sup>II</sup>(porphin) + O<sub>2</sub><sup>-</sup> + DMSO + K<sup>+</sup>}

Total energy: -1843.12784180470

#### Cartesian coordinates:

|     |               |               |               |
|-----|---------------|---------------|---------------|
| C1  | 5.0101210244  | 2.3764299073  | 0.0844686519  |
| C2  | 5.5560565551  | 1.4242630310  | -0.7120501186 |
| C3  | 4.4559713103  | 0.7965227225  | -1.4125201144 |
| C4  | 4.5988501694  | -0.2442429815 | -2.3191778050 |
| C5  | 3.5566076587  | -0.8764191424 | -2.9834183001 |
| C6  | 3.7252499309  | -1.9774579755 | -3.9057309506 |
| C7  | 2.4810434149  | -2.3285143277 | -4.3185116432 |
| C8  | 1.5602611131  | -1.4359711443 | -3.6486783938 |
| C9  | -2.1558040038 | -0.6599860133 | -3.4425718829 |
| C10 | 0.1821701253  | -1.4778164329 | -3.8155173408 |

|      |               |               |               |
|------|---------------|---------------|---------------|
| C11  | -2.6996138146 | 0.3572114775  | -2.7138664044 |
| C12  | -1.6049556307 | 1.0079612534  | -2.0382172956 |
| C13  | -1.7420755986 | 2.0872621011  | -1.1655279448 |
| C14  | -0.6917054258 | 2.6988201743  | -0.4821741271 |
| C15  | -0.8559104033 | 3.8003630075  | 0.4384161655  |
| C16  | 0.3853334501  | 4.0870181270  | 0.9184370956  |
| C17  | 1.2981322854  | 3.1653978050  | 0.2874621827  |
| C18  | -0.7344562845 | -0.6226109172 | -3.2134974159 |
| C19  | 2.6713925464  | 3.1654313340  | 0.4903690306  |
| C20  | 3.5806901602  | 2.3269230562  | -0.1371576922 |
| H21  | 5.6066964858  | -0.6011011435 | -2.5161261360 |
| H22  | 5.5077962314  | 3.0574658095  | 0.7647831537  |
| H23  | 6.5988185738  | 1.1525028362  | -0.8255474241 |
| H24  | 4.6777122496  | -2.4138792335 | -4.1824161713 |
| H25  | 2.1925727401  | -3.1131553639 | -5.0083038466 |
| H26  | -2.6615765661 | -1.3654659974 | -4.0920659302 |
| H27  | -3.7392418276 | 0.6577493771  | -2.6473611346 |
| H28  | -1.7977981897 | 4.2877937472  | 0.6644780574  |
| H29  | 0.6719084834  | 4.8584206034  | 1.6239687637  |
| H30  | 3.0689455271  | 3.8937031886  | 1.1931599637  |
| H31  | -0.2147429023 | -2.2368106288 | -4.4857435238 |
| N32  | -0.4116350776 | 0.3939528594  | -2.3469274121 |
| N33  | 0.6270381233  | 2.3206586275  | -0.5554789819 |
| N34  | 3.2697211866  | 1.3623049896  | -1.0500334663 |
| N35  | 2.2365367128  | -0.5601460232 | -2.8472069881 |
| O36  | 1.3088052378  | -0.4599222286 | -0.3343572579 |
| O37  | 1.6102031362  | -0.1239515768 | 0.9125378967  |
| Fe38 | 1.4704717412  | 0.8529006207  | -1.6748231763 |
| O39  | 1.7980302050  | 2.2251474475  | -3.2439533748 |
| S40  | 0.6031266939  | 2.9421929473  | -3.8740301403 |
| C41  | 1.2905063136  | 4.5351180408  | -4.4039103051 |
| C42  | 0.4033652247  | 2.2095201054  | -5.5241679996 |
| H43  | -0.3618218949 | 2.7583253535  | -6.0828458510 |
| H44  | 0.5517851695  | 5.0803731396  | -4.9999743509 |
| H45  | 2.2073205317  | 4.3627713755  | -4.9754749499 |
| H46  | 1.5236346662  | 5.0962330055  | -3.4957072268 |
| H47  | 1.3629119946  | 2.2234772862  | -6.0498509317 |
| H48  | 0.0836797918  | 1.1766207286  | -5.3659540058 |
| H49  | -2.7393814711 | 2.4992841193  | -1.0277908169 |
| K50  | -0.9919692177 | -0.2355978639 | 0.7067062144  |

## References:

1. A. Ikezaki, M. Nakamura, *Inorg. Chem.* **2002**, *41*, 6225-6236.
2. a) A. Shirazi, H. M. Goff, *J. Am. Chem. Soc.* **1982**, *104*, 6318-6322; b) Walker, F. A. *The porphyrin handbook* Vol. 5 (Academic Press, New York, 2003), p. 81-182.
3. a) R. C. Parmely, H. M. Goff, *J. Inorg. Biochem.* **1980**, *12*, 269-280; b) Song, B.; Park, B.; Han, C. *Bull. Korean Chem. Soc.* **2002**, *23*, 119-122.
4. R. G. Wilkins, *Kinetics and Mechanisms of Reactions of Transition Metal Complexes*, VCH, New York, **1991**.
5. Duerr, K.; Jux, N.; Zahl, A.; van Eldik, R.; Ivanovic-Burmazovic, I. *Inorg. Chem.* **2010**, DOI: 10.1021/ic102092h.



6. a) M. Spitzer, F. Gartig, R. van Eldik, *Rev. Sci. Instrum.* **1988**, 59, 2092-2093; b) K. F. Fleischmann, G. E. Conze, R. D. Stranks, H. Kelm, *Rev. Sci. Instrum.* **1974**, 45, 1427.
7. Jaguar, version 6.0, Schrödinger, LLC, New York, NY, 2005.
8. J. P. Hay; W.R. Wadt *Journal of Chemical Physics*, **82**, 299 (1985)
9. The LACV3P basis set is a triple-zeta contraction of the LACVP basis set developed and tested at Schrödinger, Inc.
